# Supplementary material for: Preparation of Zirconium-89 Solutions for Radiopharmaceutical Purposes: Interrelation Between Formulation, Radiochemical Purity, Stability and Biodistribution
Source: PubMed Central journal article supplement (PMC6514948; doi:10.3390/molecules24081534), 2019-04-18

## Supplementary materials for:

# Preparation of Zirconium-89 Solutions for Radiopharmaceutical Purposes: Interrelation Between Formulation, Radiochemical Purity, Stability and Biodistribution

Anton Larenkov \*, Victor Bubenschikov, Artur Makichyan, Maria Zhukova, Alina Krasnoperova, Galina Kodina

### Content:

|                   |                                                                                                                                                                           |    |
|-------------------|---------------------------------------------------------------------------------------------------------------------------------------------------------------------------|----|
| <b>Table S1.</b>  | Radio-chromatograms of different zirconium-89 – oxalic acid preparations with iTLC-SG / CH <sub>3</sub> OH-H <sub>2</sub> O (1:1), 4% TFA (v/v) system.....               | 2  |
| <b>Table S2.</b>  | Radio-chromatograms of different zirconium-89 – HCl preparations with iTLC-SG / CH <sub>3</sub> OH-H <sub>2</sub> O (1:1), 4% TFA (v/v) system.....                       | 2  |
| <b>Figure S1.</b> | Radio-chromatograms of different zirconium-89 preparations in HCl (iTLC-SG / 50 mM DTPA pH 7.0).....                                                                      | 2  |
| <b>Figure S2.</b> | Elution profiles of ZR-resin column (50 mg, 50 mm × Ø2.1 mm) with oxalic acid of different concentrations.....                                                            | 3  |
| <b>Table S3.</b>  | Radio-TLC analysis results of [ <sup>89</sup> Zr]Zr-oxalate preparations obtained with ZR-resin and solutions of different oxalic acid concentrations.....                | 3  |
| <b>Table S4.</b>  | Radio-TLC analysis results for [ <sup>89</sup> Zr]Zr-oxalate preparations obtained without and after ZR-resin.....                                                        | 4  |
| <b>Figure S3.</b> | Chelex-100 column elution profile using 0,1 M Na <sub>3</sub> Citr and 0.1 M Na <sub>2</sub> C <sub>2</sub> O <sub>4</sub> as eluents.....                                | 4  |
| <b>Figure S4.</b> | The effect of various solutions used for column wash on recovery efficiency of zirconium-89 with Chelex-100 resin.....                                                    | 5  |
| <b>Table S5.</b>  | Radio-chromatograms of different [ <sup>89</sup> Zr]Zr-citrate preparations.....                                                                                          | 5  |
| <b>Figure S5.</b> | The scheme of methods proposed for preparation of zirconium-89 solutions for radiopharmaceutical purposes.....                                                            | 6  |
| <b>Table S6.</b>  | Radio-TLC analysis results of [ <sup>89</sup> Zr]Zr-oxalate preparations during their storage.....                                                                        | 7  |
| <b>Table S7.</b>  | Examples of analysis of the products of zirconium-89 reactions with DFO.....                                                                                              | 8  |
| <b>Table S8.</b>  | The results of the analysis of various preparations of zirconium-89 while keeping the samples at room temperature and when heated.....                                    | 9  |
| <b>Figure S6.</b> | The scheme of zirconium-89 reconstitution from oxalic acid solution into hydrochloric acid solution using Chromafix 30PS-HCO <sub>3</sub> anion-exchange cartridge.....   | 10 |
| <b>Table S9.</b>  | Radio-TLC results (method 2) of zirconium-89 samples obtained in 1.0 M HCl using oxalate-free technology and using the reconstitution method from oxalic acid solution... | 10 |
| <b>Table S10.</b> | Radio-chromatograms in various systems. Zirconium-89 samples obtained in 1.0 M HCl using oxalate-free technology and those reconstituted from oxalic acid solution.....   | 10 |

**Table S1.** Radio-chromatograms of different zirconium-89 – oxalic acid preparations with iTLC-SG / CH<sub>3</sub>OH-H<sub>2</sub>O (1:1), 4% TFA (v/v) system.

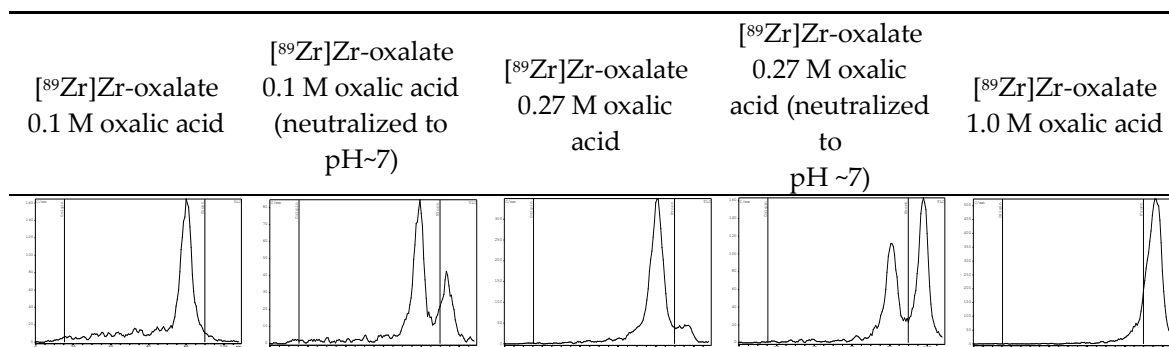

**Table S2.** Radio-chromatograms of different zirconium-89 – HCl preparations with iTLC-SG / CH<sub>3</sub>OH-H<sub>2</sub>O (1:1), 4% TFA (v/v) system.

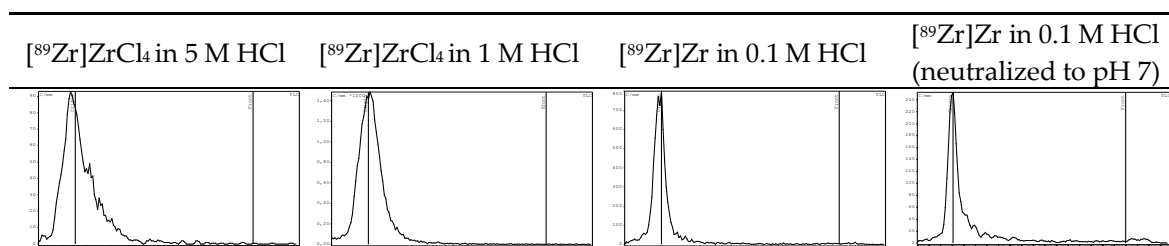

These samples were prepared from [<sup>89</sup>Zr]ZrCl<sub>4</sub> in 5 M HCl initial solution obtained by the manufacturer using oxalate-free method (with Dowex 1×8 anion-exchange resin)

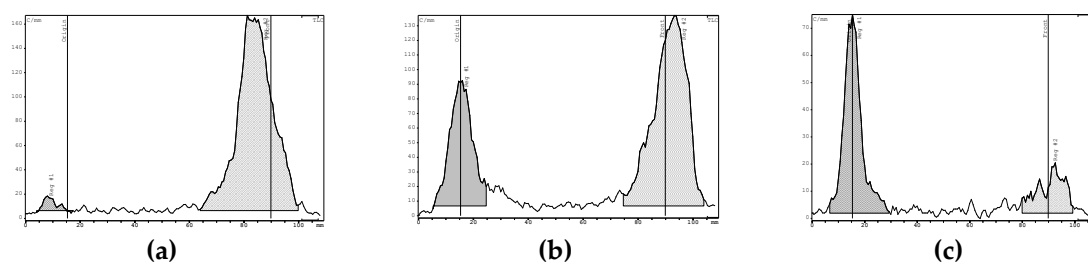

**Figure S1.** Radio-chromatograms of different zirconium-89 preparations in HCl (iTLC-SG / 50 mM DTPA pH 7.0): (a) 5 M HCl; (b) 1 M HCl; (c) 0.1 M HCl.

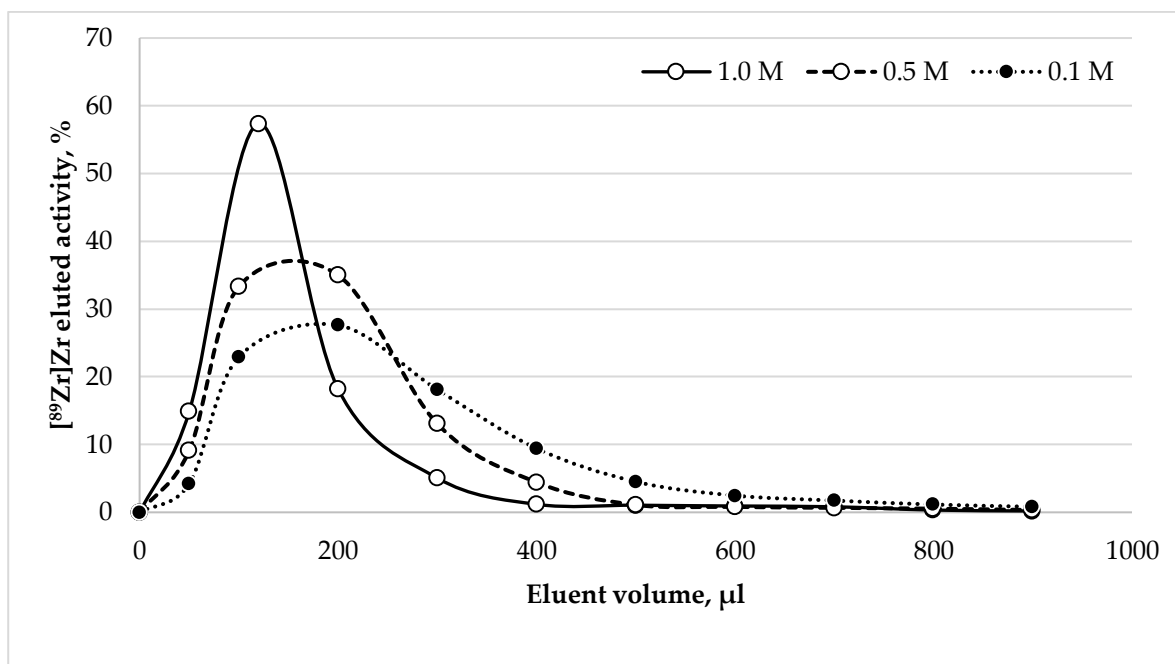

**Figure S2.** Elution profiles of ZR-resin column (50 mg, 50 mm × Ø2.1 mm) with oxalic acid of different concentrations.

**Table S3.** Radio-TLC analysis results of  $[^{89}\text{Zr}]\text{Zr}$ -oxalate preparations obtained with ZR-resin and solutions of different oxalic acid concentrations (final pH of all preparations was 6.5).

|                 |     | Oxalic acid concentration in the sample (moles/L) |     |     |     |     |
|-----------------|-----|---------------------------------------------------|-----|-----|-----|-----|
|                 |     | 0.1                                               | 0.2 | 0.3 | 0.4 | 0.5 |
| <i>method 1</i> |     |                                                   |     |     |     |     |
|                 | %§  | 100                                               | ~55 | ~40 | ~35 | ~10 |
| <i>method 2</i> |     |                                                   |     |     |     |     |
|                 | %§§ | ~10                                               | ~30 | ~35 | ~45 | ~50 |

§ % of zirconium-89 activity at the origin of chromatogram; §§ % of zirconium-89 activity at  $R_f$  1.0 peak.

**Table S4.** Radio-TLC analysis results for [ $^{89}\text{Zr}$ ]Zr-oxalate preparations obtained without and after ZR-resin.

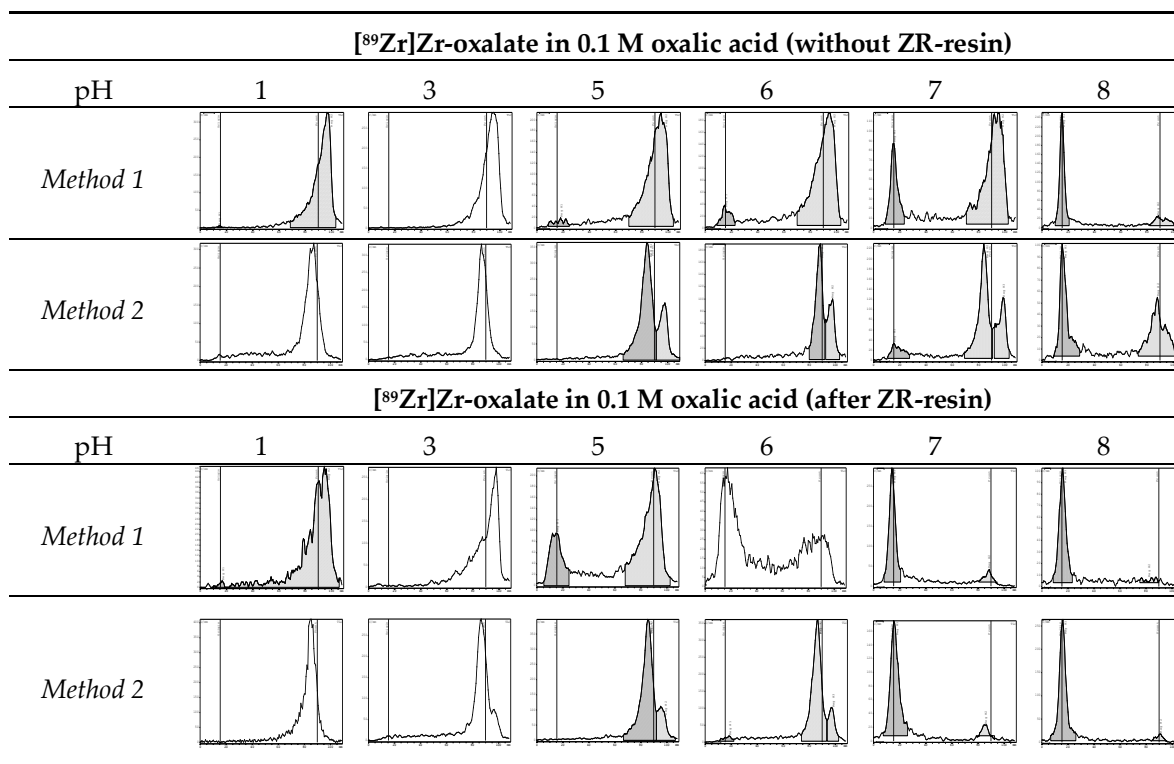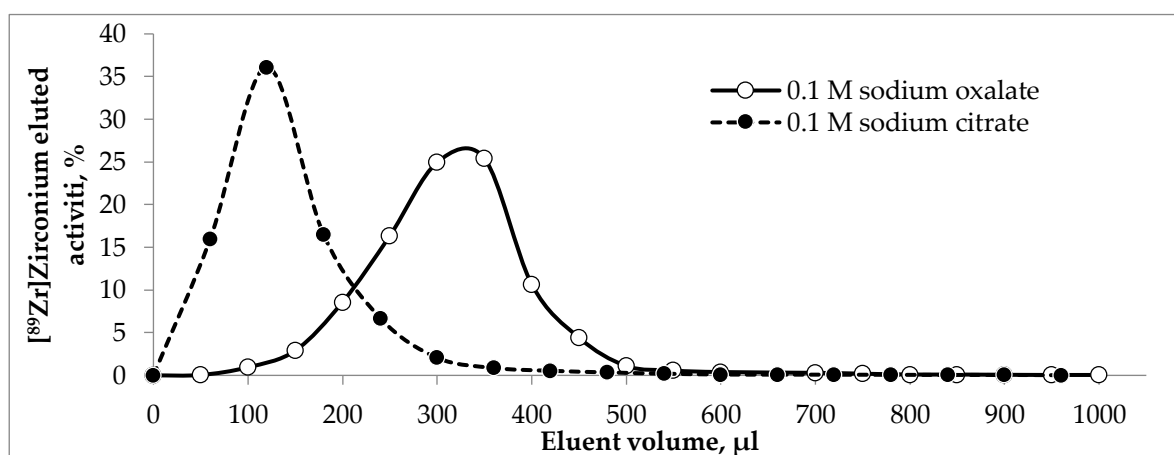

**Figure S3.** Chelex-100 column elution profile using 0,1 M  $\text{Na}_3\text{Cit}$  and 0.1 M  $\text{Na}_2\text{C}_2\text{O}_4$  as eluents (50 mm  $\times$   $\varnothing$ 2.1 mm column, 60 mg of resin, load from 0.5 M oxalic acid medium (ZR-resin), eluent flow rate – 1 mL/min).

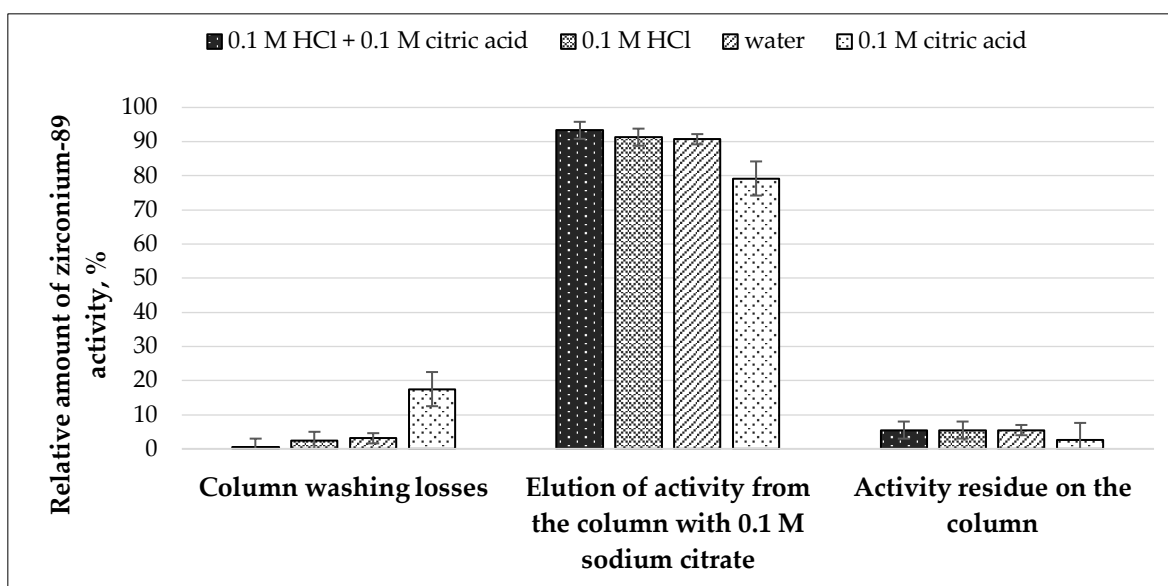

**Figure S4.** The effect of various solutions used for column wash on recovery efficiency of zirconium-89 with Chelex-100 resin (50 mm × Ø2.1 mm column, 60 mg of resin, load from 0.5 M oxalic acid medium (ZR-resin), losses at the sorption step – 0.7 %, eluents flow rate – 1 mL/min).

**Table S5.** Radio-chromatograms of different [<sup>89</sup>Zr]Zr-citrate preparations.

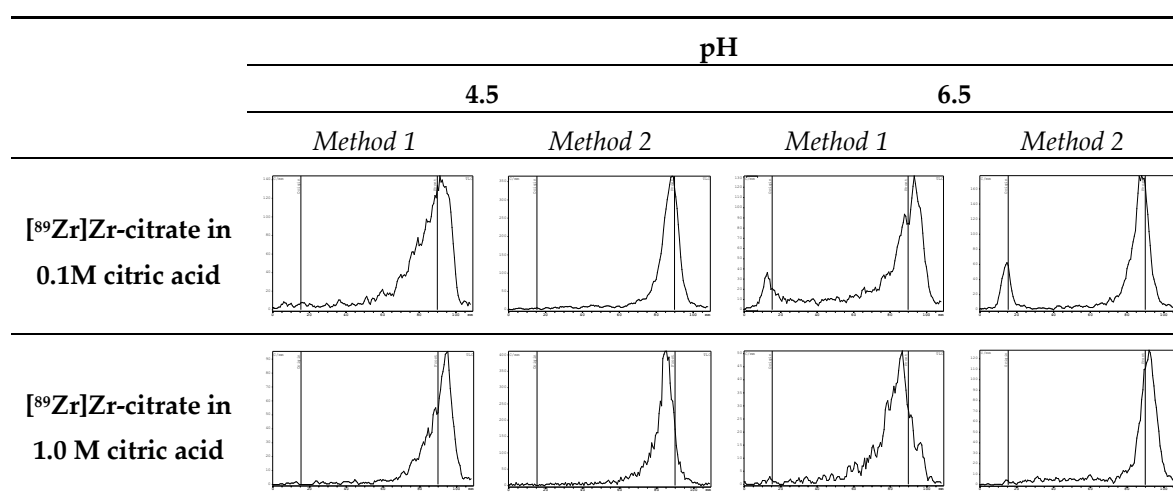

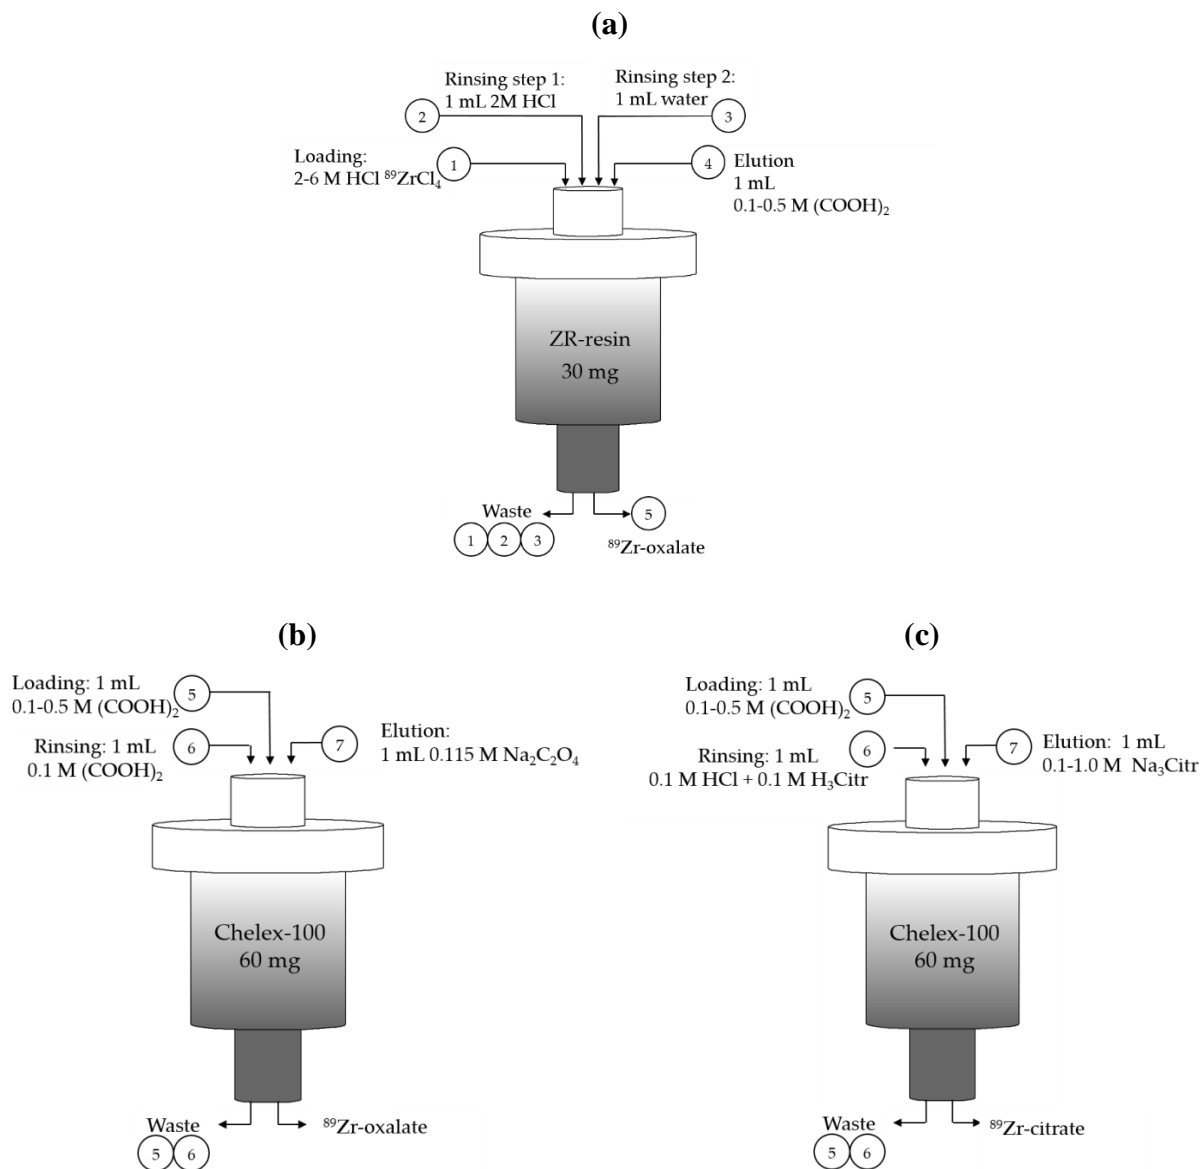

**Figure S5.** The scheme of methods proposed for preparation of zirconium-89 solutions for radiopharmaceutical purposes: **(a)** using ZR-resin only (zirconium-89 is obtained in 0.1-0.115 M oxalic acid); **(b)** using combination of ZR-resin and Chelex-100 (zirconium-89 is obtained in 0.1-0.116 M sodium oxalate); **(c)** using combination of ZR-resin and Chelex-100 (zirconium-89 is obtained in 0.1-1.0 M sodium citrate).

**Table S6.** Radio-TLC analysis results of  $[^{89}\text{Zr}]\text{Zr}$ -oxalate preparations during their storage.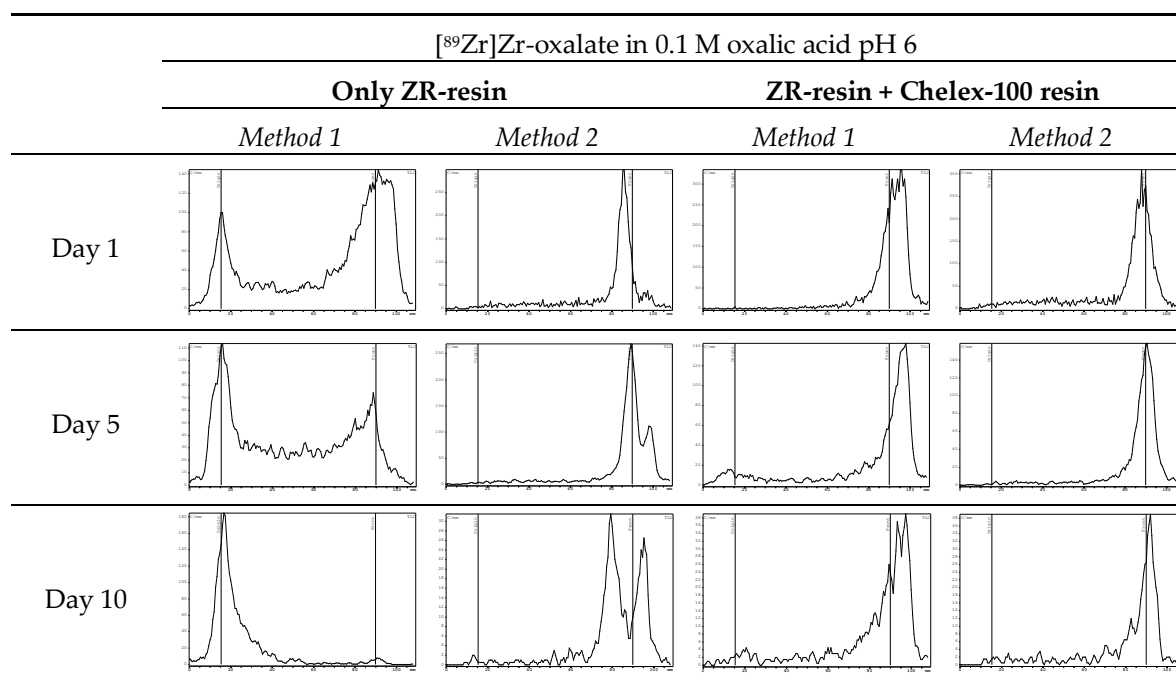

Table S7. Examples of analysis of the products of zirconium-89 reactions with DFO.

| [ <sup>89</sup> Zr]zirconium formulation                       | Reaction mixture | Radio-chromatograms                                                                 |                                                                                      |                                                                                            |
|----------------------------------------------------------------|------------------|-------------------------------------------------------------------------------------|--------------------------------------------------------------------------------------|--------------------------------------------------------------------------------------------|
|                                                                |                  | iTLC-SG /<br>50 mM DTPA<br>(pH 7)<br><i>method 1</i>                                | iTLC-SA /<br>50 mM EDTA<br>(pH 5)                                                    | iTLC-SG /<br>CH <sub>3</sub> OH-H <sub>2</sub> O (1:1),<br>4% TFA (v/v)<br><i>method 2</i> |
|                                                                | <i>pure</i>      | 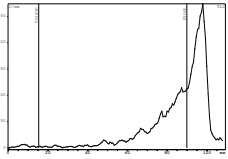   |    |         |
| [ <sup>89</sup> Zr]Zr-oxalate<br>(0.1 M oxalate anion)<br>pH 6 | + 5.0 μg<br>DFO  |    |    |         |
|                                                                | + 0.25 μg<br>DFO |    |    |         |
| [ <sup>89</sup> Zr]Zr-citrate<br>(0.1 M citrate anion)<br>pH 6 | <i>pure</i>      |  |  |       |
|                                                                | + 5.0 μg<br>DFO  |  |  |       |
|                                                                | + 0.1 μg<br>DFO  |  |  |       |



**Table S8.** The results of the analysis of various preparations of zirconium-89 while keeping the samples at room temperature and when heated.

| [ <sup>89</sup> Zr]zirconium formulation                          | Temperature conditions  | Radio-chromatograms                                                                  |                                                                                            |
|-------------------------------------------------------------------|-------------------------|--------------------------------------------------------------------------------------|--------------------------------------------------------------------------------------------|
|                                                                   |                         | iTLC-SG /<br>50 mM DTPA<br>(pH 7)<br><i>method 1</i>                                 | iTLC-SG /<br>CH <sub>3</sub> OH-H <sub>2</sub> O (1:1), 4%<br>TFA (v/v)<br><i>method 2</i> |
| [ <sup>89</sup> Zr]Zr-oxalate<br>(0.1 M oxalate acid)<br>pH 5.5   | <i>room temperature</i> | 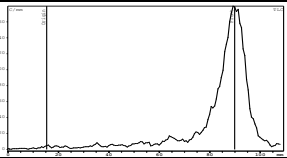   |         |
|                                                                   | <i>95°C, 30 min</i>     |    |         |
| [ <sup>89</sup> Zr]Zr-citrate<br>(0.1 M sodium citrate)<br>pH 5.5 | <i>room temperature</i> |    |         |
|                                                                   | <i>95°C, 30 min</i>     |   |        |
| [ <sup>89</sup> Zr]Zr-citrate<br>(1.0 M sodium citrate)<br>pH 5.5 | <i>room temperature</i> |  |       |
|                                                                   | <i>95°C, 30 min</i>     |  |       |

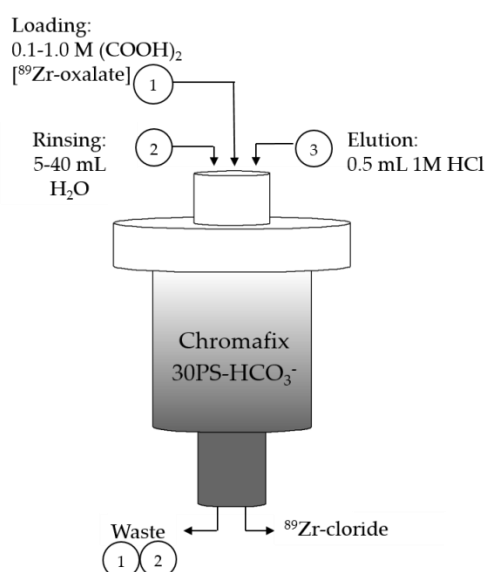

**Figure S6.** The scheme of zirconium-89 reconstitution from oxalic acid solution into hydrochloric acid solution using Chromafix 30PS-HCO<sub>3</sub><sup>-</sup> anion-exchange cartridge.

**Table S9.** Radio-TLC results (method 2) of zirconium-89 samples obtained in 1.0 M HCl using oxalate-free technology and using the reconstitution method from oxalic acid solution.

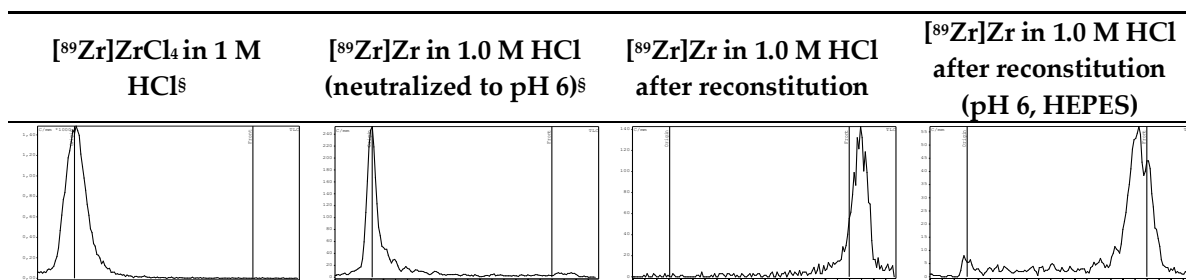

§ These samples were prepared from [<sup>89</sup>Zr]ZrCl<sub>4</sub> in 5 M HCl initial solution obtained by the manufacturer using oxalate-free method (with Dowex 1×8 anion-exchange resin);

**Table S10.** Radio-chromatograms in various systems. Zirconium-89 samples obtained in 1.0 M HCl using oxalate-free technology and those reconstituted from oxalic acid solution (pH = 6).

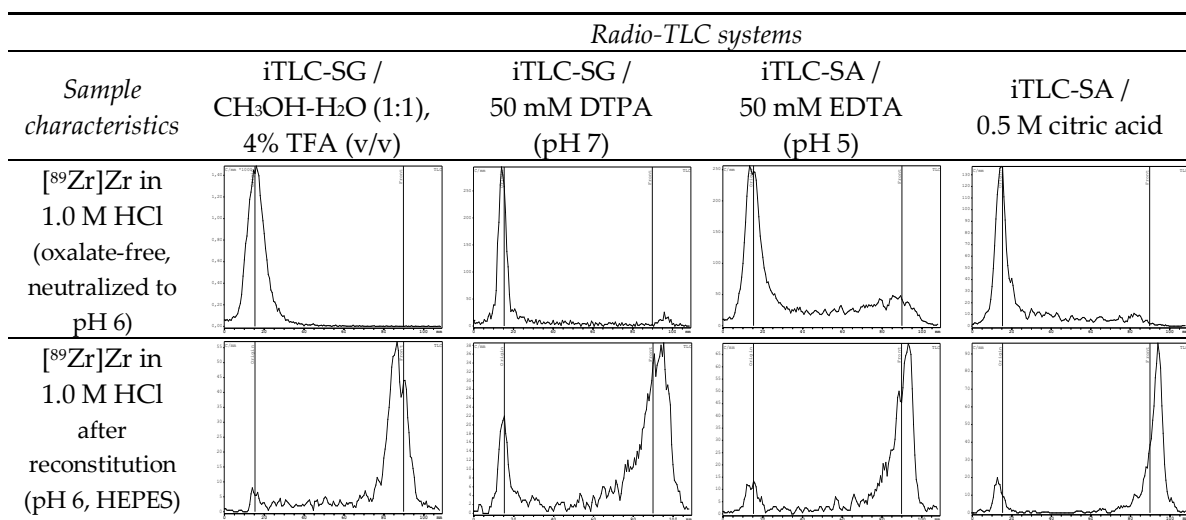

Supplement: molecules-24-01534-s001.pdf [file molecules-24-01534-s001.pdf]
